# Characterization of the transcriptome, nucleotide sequence polymorphism, and natural selection in the desert adapted mouse *Peromyscus eremicus*

Matthew D. MacManes<sup>1</sup>, Michael B. Eisen<sup>2</sup>,

<sup>1</sup> Department of Molecular, Cellular and Biomedical Sciences, University of New Hampshire, Durham NH, USA

<sup>2</sup> HHMI and University of California, Berkeley, Berkeley, CA, USA

\* E-mail: macmanes@gmail.com, @PeroMHC

## 1 Abstract

2 As a direct result of intense heat and aridity, deserts are thought to be among the most harsh of  
3 environments, particularly for their mammalian inhabitants. Given that osmoregulation can be  
4 challenging for these animals, with failure resulting in death, strong selection should be observed  
5 on genes related to the maintenance of water and solute balance. One such animal, *Peromyscus*  
6 *eremicus*, is native to the desert regions of the southwest United States and may live its entire  
7 life without oral fluid intake. As a first step toward understanding the genetics that underlie  
8 this phenotype, we present a characterization of the *P. eremicus* transcriptome. We assay four  
9 tissues (kidney, liver, brain, testes) from a single individual and supplement this with popu-  
10 lation level renal transcriptome sequencing from 15 additional animals. We identified a set of  
11 transcripts undergoing both purifying and balancing selection based on estimates of Tajima's  
12 D. In addition, we used the branch-site test to identify a transcript -Slc2a9, likely related to  
13 desert osmoregulation – undergoing enhanced selection in *P. eremicus* relative to a set of related  
14 non-desert rodents.

## 16 Introduction

17 Deserts are widely considered one of the harshest environments on Earth. Animals living in  
18 desert environments are forced to endure intense heat and drought, and as a result, species liv-  
19 ing in these environments are likely to possess specialized mechanisms to deal with them. While  
20 living in deserts likely involves a large number of adaptive traits, the ability to osmoregulate –  
21 to maintain the proper water and electrolyte balance – appears to be paramount [1]. Indeed,  
22 the maintenance of water balance is one of the most important physiologic processes for all  
23 organisms, whether they be desert inhabitants or not. Most animals are exquisitely sensitive  
24 to changes in osmolality, with slight derangement eliciting physiologic compromise. When the  
25 loss of water exceeds dietary intake, dehydration - and in extreme cases, death - can occur.

Thus there has likely been strong selection for mechanisms supporting optimal osmoregulation in species that live where water is limited. Understanding these mechanisms will significantly enhance our understanding of the physiologic processes underlying osmoregulation in extreme environments, which will have implications for studies of human health, conservation, and climate change.

The genes and structures responsible for the maintenance of water and electrolyte balance are well characterized in model organisms such as mice [2], rats [3–5], and humans [6–8]. These studies, many of which have been enabled by newer sequencing technologies, provide a foundation for studies of renal genomics in non-model organisms. Because researchers have long been interested in desert adaptation, a number of studies have looked at the morphology or expression of single genes in the renal tissues of desert adapted rodents *Phyllotis darwini* [9], *Psammomys obesus* [10], and *Perognathus penicillatus* [11]. More recently, full renal transcriptomes have been generated for *Dipodomys spectabilis* and *Chaetodipus baileyi*, [12] as well as *Abrothrix olivacea* [13].

These studies provide a rich context for current and future work aimed at developing a synthetic understanding of the genetic and genomic underpinnings of desert adaptation in rodents. As a first step, we have sequenced, assembled, and characterized the transcriptome (using four tissue types - liver, kidney, testes and brain) of a desert adapted cricetid rodent endemic to the southwest United States [14], *Peromyscus eremicus*. These animals have a lifespan typical of small mammals, and therefore an individual may live its entire life without ever drinking water. These rodents have distinct advantage over other desert animals (e.g. *Dipodomys*) in that they breed readily in captivity, which enables future laboratory studies of the phenotype of interest. In addition, the focal species is positioned in a clade of well known animals (e.g. *P. californicus*, *P. maniculatus*, and *P. polionotus*) [15] with growing genetic and genomic resources [16–18]. Together, this suggests that future comparative studies are possible.

While the elucidation of the mechanisms underlying adaptation to desert survival is beyond the scope of this manuscript, we aim to lay the groundwork by characterizing the transcriptome from four distinct tissues (brain, liver, kidney, testes). These data will be included in the current larger effort aimed at sequencing the entire genome. Further, via sequencing the renal tissue of a total of 15 additional animals, we characterize nucleotide polymorphism and genome-wide patterns of natural selection. Together, these investigations will aid in our overarching goal to understand the genetic basis of adaptation to deserts in *P. eremicus*.

# 61 Materials and Methods

## 62 Animal Collection and Study Design

63 To begin to understand how genes may underlie desert adaptation, we collected 16 individuals  
64 from a single population of *P. eremicus* over a two-year time period (2012-2013). These individ-  
65 uals were captured in live traps and then euthanized using isoflurane overdose and decapitation.  
66 Immediately post-mortem, the abdominal and pelvic organs were removed, cut in half (in the  
67 case of the kidneys), placed in RNAlater and flash frozen in liquid Nitrogen. Removal of the  
68 brain, with similar preservation techniques, followed. Time from euthanasia to removal of all  
69 organs never exceeded five minutes. Samples were transferred to a -80C freezer at a later date.  
70 These procedures were approved by the University of California Berkeley Animal Care and Use  
71 Committee and followed guidelines established by the American Society of Mammalogy for the  
72 use of wild animals in research [19].

## 73 RNA extraction and Sequencing

74 Total RNA was extracted from each tissue using a TRIzol extraction (Invitrogen) following the  
75 manufacturer's instructions. Because preparation of an RNA library suitable for sequencing is  
76 dependent on having high quality, intact RNA, a small aliquot of each total RNA extract was  
77 analyzed on a Bioanalyzer 2100 (Agilent, Palo Alto, CA, USA). Following confirmation of sample  
78 quality, the reference sequencing libraries were made using the TruSeq stranded RNA prep kit  
79 (Illumina), while an unstranded TruSeq kit was used to construct the other sequencing libraries.  
80 A unique index was ligated to each sample to allow for multiplexed sequencing. Reference  
81 libraries (n=4 tissue types) were then pooled to contain equimolar quantities of each individual  
82 library and submitted for Illumina sequencing using two lanes of 150nt paired end sequencing  
83 employing the rapid-mode of the HiSeq 2500 sequencer at The Hubbard Center for Genome  
84 Sciences (University of New Hampshire). The remaining 15 libraries were similarly multiplexed  
85 and sequenced in a mixture of 100nt paired and single end sequencing runs across several lanes  
86 of an Illumina HiSeq 2000 at the Vincent G. Coates Genome Center (University of California,  
87 Berkeley).

## 88 Sequence Data Preprocessing and Assembly

89 The raw sequence reads corresponding to the four tissue types were error corrected using the  
90 software bless [20] using kmer=25, based on the developer's default recommendations. The  
91 error-corrected sequence reads were adapter and quality trimmed following recommendations  
92 from MacManes [21] and Mbandi [22]. Specifically, adapter sequence contamination and low

quality nucleotides (defined as PHRED <2) were removed using the program Trimmomatic version 0.32 [23]. Reads from each tissue were assembled using the Trinity version released 17 July 2014 [24]. We used flags to indicate the stranded nature of sequencing reads and set the maximum allowable physical distance between read pairs to 999nt. The assembly was conducted on a linux workstation with 64 cores and 512Gb RAM. To filter the raw sequence assembly, we downloaded *Mus musculus* cDNA and ncRNA datasets from Ensembl ([ftp://ftp.ensembl.org/pub/release-75/fasta/mus\\_musculus/](ftp://ftp.ensembl.org/pub/release-75/fasta/mus_musculus/)) and the *Peromyscus maniculatus* reference transcriptome from NCBI ([ftp://ftp.ncbi.nlm.nih.gov/genomes/Peromyscus\\_maniculatus\\_bairdii/RNA/](ftp://ftp.ncbi.nlm.nih.gov/genomes/Peromyscus_maniculatus_bairdii/RNA/)). We used a blastN procedure (default settings, evaluate set to  $10^{-10}$ ) to identify contigs in the *P. eremicus* dataset likely to be biological in origin. This procedure, when a reference dataset is available, retains more putative transcripts than a strategy employing expression-based filtering (remove if TMP <1 [25]) of the raw assembly. We then concatenated the filtered assemblies from each tissue into a single file and reduced redundancy using the software cd-hit-est [26] using default setting, except that sequences were clustered based on 95% sequence similarity. This multi-fasta file was used for all subsequent analyses, including annotation and mapping.

## Assembled Sequence Annotation

The filtered assemblies were annotated using the default settings of the blastN algorithm [27] against the Ensembl cDNA and ncRNA datasets described above, downloaded on 1 August 2014. Among other things, the Ensembl transcript identifiers were used in the analysis of gene ontology conducted in the PANTHER package [28]. Next, because rapidly evolving nucleotide sequences may evade detection by blast algorithms, we used HMMER3 [29] to search for conserved protein domains contained in the dataset using the Pfam database [30]. Lastly, we extracted putative coding sequences using Transdecoder version 4Jul2014 (<http://transdecoder.sourceforge.net/>)

To identify patterns of gene expression unique to each tissue type, we mapped sequence reads from each tissue type to the reference assembly using bwa-mem [31]. We estimated expression for the four tissues individually using default settings of the software eXpress [32]. Interesting patterns of expression, including instances where expression was limited to a single tissue type, were identified and visualized.

## 126 Population Genomics

127 In addition to the reference individual sequenced at four different tissue types, we sequenced  
128 15 other conspecific individuals from the same population in Palm Desert, California. Sequence  
129 data were mapped to the reference transcriptome using bwa-mem. The alignments were sorted  
130 and converted to BAM format, then passed to the program ANGSD version 0.610, which was  
131 used for calculating the folded site frequency spectrum (SFS) and Tajima's D [33].

## 133 Natural Selection

134 To characterize natural selection on several genes related to water and ion homeostasis, we iden-  
135 tified several of the transcripts identified as experiencing positive selection in a recent work on  
136 desert-adaptor *Dipodomys* rodents. The coding sequences corresponding to these genes, Solute  
137 Carrier family 2 member 9 (Slc2a9) and the Vitamin D3 receptor (Vdr), were extracted from  
138 the dataset, aligned using the software MACSE [34] to homologous sequences in *Mus musculus*,  
139 *Rattus norvegicus*, *Peromyscus maniculatus*, and *Homo sapiens* as identified by the conditional  
140 reciprocal best blast procedure (CRBB, [35]). An unrooted gene tree was constructed using the  
141 online resource Clustal-Omega, and the tree and alignment were analyzed using the branch-site  
142 model (model=2, nsSites=2, fix\_omega=0 versus model=2, nsSites=2, fix\_omega=1, omega=1)  
143 implemented in PAML version 4.8 [36,37]. Significance was evaluated via the use of the likeli-  
144 hood ratio test.

## 146 Results and Discussion

### 147 RNA extraction, Sequencing, Assembly, Mapping

148 RNA was extracted from the hypothalamus, renal medulla, testes, and liver from each individual  
149 using sterile technique. TRIzol extraction resulted in a large amount of high quality (RIN  $\geq$   
150 8) total RNA, which was then used as input. Libraries were constructed as per the standard  
151 Illumina protocol and sequenced as described above. The number of reads per library varied  
152 from 56 million strand-specific paired-end reads in Peer360 kidney, to 9 million single-end reads  
153 in Peer321 (Table 1, available on the Short Read Archive accession XXX). Adapter sequence  
154 contamination and low-quality nucleotides were eliminated, which resulted in a loss of <2% of  
155 the total number of reads. These trimmed reads served as input for all downstream analyses.

### 156 Table 1

| DATASET        | NUM. RAW READS |
|----------------|----------------|
| PEER360 TESTES | 32M PE/SS      |
| PEER360 LIVER  | 53M PE /SS     |
| PEER360 KIDNEY | 56M PE/SS      |
| PEER360 BRAIN  | 23M PE/SS      |
| PEER305        | 19M PE         |
| PEER308        | 15M PE         |
| PEER319        | 14M PE         |
| PEER321        | 9M SE          |
| PEER340        | 16M PE         |
| PEER352        | 14M PE         |
| PEER354        | 9M SE          |
| PEER359        | 14M PE         |
| PEER365        | 16M PE         |
| PEER366        | 16M PE         |
| PEER368        | 14M PE         |
| PEER369        | 14M PE         |
| PEER372        | 17M SE         |
| PEER373        | 23M SE         |
| PEER380        | 16M SE         |
| PEER382        | 14M SE         |

Table 1. The number of sequencing reads per sample, indicated by Peer[number]. PE=paired end, SS=strand specific, SE=single end sequencing.

Transcriptome assembly for each tissue type was accomplished using the program Trinity [24]. The raw assembly for brain, liver, testes, and kidney contained 185425, 222096, 180233, and 514091 assembled sequences respectively. This assembly was filtered using a blastN procedure against the *Mus* cDNA and ncRNA and *P. maniculatus* cDNAs, which resulted in a final dataset containing 68331 brain-specific transcripts, 71041 liver-specific transcripts, 67340 testes-specific transcripts, and 113050 kidney-specific transcripts. Mapping the error-corrected adapter/quality trimmed reads to these datasets resulted in mapping 94.98% (87.01% properly paired) of the brain-derived reads to the brain transcriptome, 96.07% (88.13% properly paired) of the liver-derived reads to the liver transcriptome, 96.81% (85.10% properly paired) of the testes-derived reads to the testes transcriptome, and 91.87% (83.77% properly paired) of the kidney-derived reads to the kidney transcriptome. Together, these statistics suggest that the tissue-specific transcriptomes are of extremely high quality. All tissue-specific assemblies are to be made available on Dryad.

174

175

**Figure 1**

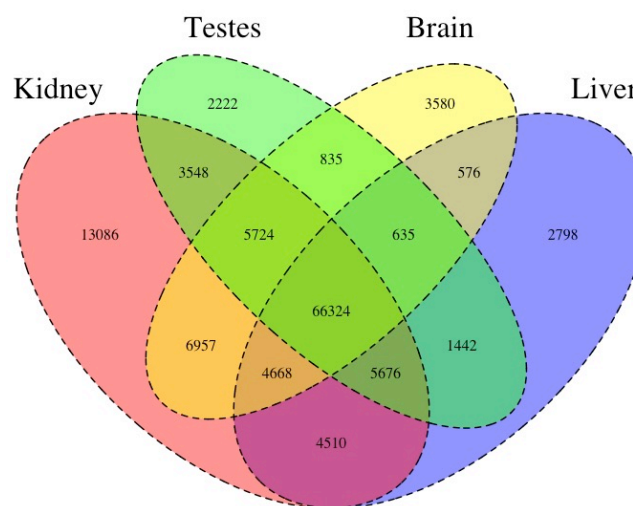

176

177

Figure 1. The Venn Diagram.

178

179

180

181

182

183

184

185

186

187

188

189

190

191

192

193

194

195

We then estimated gene expression on each of these tissue-specific datasets, which allowed us to understand expression patterns in the multiple tissues. Specifically, we constructed a Venn diagram (Figure 1) that allowed us to visualize the proportion of genes whose expression was limited to a single tissue and those whose expression was ubiquitous. 66324 transcripts are expressed on all tissue types, while 13086 are uniquely expressed in the kidney, 2222 in the testes, 3580 in the brain, and 2798 in the liver. The kidney appears to an outlier in the number of unique sequences, though this could be the result of the recovery of more lowly expressed transcripts that may be the result of deeper sequencing.

In addition to this, we estimated mean TMP (number of transcripts per million) for all transcripts. Table 2 consists of the 10 genes whose mean TMP was the highest. Several genes in this list are predominately present in a single tissue type. For instance Transcript.126459, Albumin is very highly expressed in the liver, but less so in the other tissues. It should be noted, however, that making inference based on uncorrected values for TPM is not warranted. Statistical testing for differential expression was not implemented due to the fact that no replicates are available.

After expression estimation, the filtered assemblies were concatenated together, and after the removal of redundancy with cd-hit-est, 123,123 putative transcripts remained (to be made



available on Genbank). From this filtered concatenated dataset, we extracted 71626 putative coding sequences (72Mb, to be made available on Dryad). Of these 71626 sequences, 38221 were complete exons (containing both start and stop codons), while the others were either truncated at the 5-prime end (20239 sequences), the 3-prime end (6445 sequences), or were internal (6721 sequencing with neither stop nor start codon). The results of a Pfam search conducted on the predicted amino acid sequences will be found on Dryad.

**Table 2**

| Transcript ID     | Testes   | Liver    | Kidney   | Brain    | Genbank ID     | Gene ID |
|-------------------|----------|----------|----------|----------|----------------|---------|
| Transcript_83842  | 2.05E+03 | 6.40E+03 | 1.03E+04 | 5.47E+03 | DQ073446.1     | COX2    |
| Transcript_126459 | 1.43E+01 | 2.22E+04 | 2.77E+01 | 6.73E+00 | XM_006991665.1 | Alb     |
| Transcript_128937 | 4.39E+00 | 1.91E+04 | 4.74E+02 | 2.23E+00 | XM_007627625.1 | Apoa2   |
| Transcript_81233  | 1.71E+03 | 5.23E+03 | 6.11E+03 | 3.08E+03 | XM_006993867.1 | Fth1    |
| Transcript_94125  | 3.67E+01 | 1.08E+04 | 2.09E+03 | 2.75E+00 | XM_006977178.1 | CytP450 |
| Transcript_119945 | 5.03E+03 | 1.15E+03 | 1.33E+03 | 3.71E+03 | XM_008686011.1 | Ubb     |
| Transcript_5977   | 4.95E+00 | 1.01E+04 | 3.05E+02 | 3.58E+02 | XM_006978668.1 | Tf      |
| Transcript_4057   | 2.62E+01 | 9.32E+03 | 1.34E+02 | 8.38E+01 | XM_006994871.1 | Apoc1   |
| Transcript_112523 | 4.07E+02 | 7.36E+03 | 7.78E+02 | 9.54E+02 | XM_006994872.1 | Apoe    |
| Transcript_98376  | 1.98E+00 | 8.66E+03 | 1.02E+00 | 2.68E+00 | XM_006970208.1 | Ttr     |

Table 2. The 10 transcripts with the highest mean TPM (transcripts per million).

## Population Genomics

As detailed above, RNAseq data from 15 individuals were mapped to the reference transcriptome with the resulting BAM files being used as input to the software package ANGSD. The Tajima's D statistic was calculated for all transcripts covered by at least 14 of the 15 individuals. In brief, a negative Tajima's D - a result of lower than expected average heterozygosity - is often associated with purifying or directional selection, recent selective sweep or population bottleneck. In contrast, a positive value for Tajima's D represents higher than expected average heterozygosity, often associated with balancing selection.

The distribution of the estimates of Tajima's D for all of the assembled transcripts is shown in Figure 2. The distribution is skewed toward negative values (mean=-0.89, variance=0.58), which is likely the result of purifying selection, a model of evolution commonly invoked for coding DNA sequences [38]. Table 3 presents the 10 transcripts whose estimate of Tajima's D is the greatest, while Table 4 presents the 10 transcripts whose estimate of Tajima's D is the



221 least. The former list of genes is likely to contain transcripts experiencing balancing selection  
222 in the studied population. This list includes, interestingly, genes obviously related to solute  
223 and water balance (e.g. *Clcnkb* and a transmembrane protein gene) and immune function (a  
224 interferon-inducible GTPase and a Class 1 MHC gene). The latter group, containing transcripts  
225 whose estimates of Tajima's D are the smallest are likely experiencing purifying selection. Many  
226 of these transcripts are involved in core regulatory functions where mutation may have strongly  
227 negative fitness consequences.

228

229 **Figure 2**

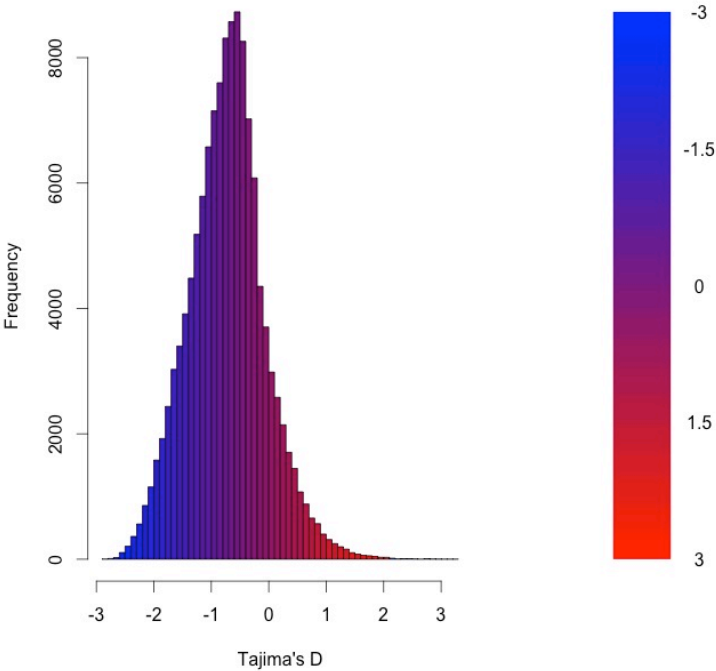

230

231 Figure 2. The distribution of Tajima's D for all putative transcripts.

232 **Table 3**

233

| Transcript ID     | GenBank ID     | Description                                         | Tajima's D |
|-------------------|----------------|-----------------------------------------------------|------------|
| Transcript_49049  | XM.006533884.1 | heterogeneous nuclear ribonucleoprotein H1 (Hnrnp1) | 3.26       |
| Transcript_38378  | XM.006522973.1 | Son DNA binding protein (Son)                       | 3.19       |
| Transcript_126187 | NM.133739.2    | transmembrane protein 123 (Tmem123)                 | 3.02       |
| Transcript_70953  | XM.006539066.1 | chloride channel Kb (Clcnkb)                        | 2.96       |
| Transcript_37736  | XM.006997718.1 | h-2 class I histocompatibility antigen              | 2.92       |
| Transcript_21448  | XM.006986148.1 | zinc finger protein 624-like                        | 2.84       |
| Transcript_47450  | NM.009560.2    | zinc finger protein 60 (Zfp60)                      | 2.82       |
| Transcript_122250 | XM.006539068.1 | chloride channel Kb (Clcnkb)                        | 2.81       |
| Transcript_78367  | XM.006496814.1 | CDC42 binding protein kinase alpha (Cdc42bpa)       | 2.78       |
| Transcript_96470  | XM.006987129.1 | interferon-inducible GTPase 1-like                  | 2.77       |

Table 3. The 10 transcripts with the highest values for Tajima's D, which suggests balancing selection.

236 **Table 4**

237

| Transcript ID     | GenBank ID     | Description                                               | Tajima's D |
|-------------------|----------------|-----------------------------------------------------------|------------|
| Transcript_84359  | XM.006991127.1 | nuclear receptor coactivator 3 (Ncoa3)                    | -2.82      |
| Transcript_87121  | XM.006970128.1 | methyl-CpG binding domain protein 2 (Mbd2)                | -2.82      |
| Transcript_125755 | EU053203.1     | alpha globin gene cluster                                 | -2.78      |
| Transcript_87128  | XM.006976644.1 | membrane-associated ring finger (March5)                  | -2.76      |
| Transcript_55468  | XM.006978377.1 | Vpr binding protein (Vprbp)                               | -2.75      |
| Transcript_116042 | XM.006980811.1 | membrane associated guanylate kinase (Magi3)              | -2.75      |
| Transcript_18966  | XM.006982814.1 | ubiquitin protein ligase E3 component n-recognin 5 (Ubr5) | -2.75      |
| Transcript_122204 | XM.008772511.1 | zinc finger protein 612 (Zfp612)                          | -2.75      |
| Transcript_100550 | XM.006971297.1 | bromodomain adjacent to zinc finger domain, 1B (Baz1b)    | -2.74      |
| Transcript_33267  | XM.006975561.1 | pumilio RNA-binding family member 1 (Pum1)                | -2.75      |

Table 4. The 10 transcripts with the lowest values for Tajima's D, which suggests purifying or directional selection.

## 240 Natural Selection

241 To begin to test the hypothesis that selection on transcripts related to osmoregulation is en-  
242 hanced in the desert adapted *P. eremicus*, we implemented the branch-site test as described  
243 above by setting the sequence corresponding to *P. eremicus* for both Slc2a9 and Vdr as the  
244 foreground lineages in 2 distinct program executions. These two transcripts were chosen specifi-  
245 cally because they - the former significantly - were recently linked to osmoregulation in a desert

rodent [12]. The test for Slc2a9 was highly significant ( $2\Delta\text{Lnl}=51.4$ ,  $\text{df}=1$ ,  $p=0$ ), indicating enhanced selection in *P. eremicus* relative to the other lineages. The branch site test for positive selection conducted on the Vdr gene was non-significant ( $2\Delta\text{Lnl}=0.68$ ,  $\text{df}=1$ ,  $p=1$ ). This limited analysis of selection is to be followed up by an analysis of genome wide patterns of natural selection.

## Conclusions

As a direct result of intense heat and aridity, deserts are thought to be amongst the harshest environments, particularly for mammalian inhabitants. Given that osmoregulation can be challenging for these animals - with failure resulting in death - strong selection should be observed on genes related to the maintenance of water and solute balance. This study aimed to characterize the transcriptome of a desert-adapted rodent species, *P. eremicus*. Specifically, we characterized the transcriptome of four tissue types (liver, kidney, brain, and testes) from a single individual and supplemented this with population-level renal transcriptome sequencing from 15 additional animals. We identified a set of transcripts undergoing both purifying and balancing selection based on Tajima's D. In addition, we used a branch site test to identify a transcript, likely related to desert osmoregulation, undergoing enhanced selection in *P. eremicus* relative to a set of non-desert rodents.

## Acknowledgments

## References

1. Walsberg G (2000) Small mammals in hot deserts: Some generalizations revisited. *Bio-science* 50: 109–120.
2. Tatum R, Zhang Y, Salleng K, Lu Z, Lin JJ, et al. (2009) Renal salt wasting and chronic dehydration in claudin-7-deficient mice. *AJP: Renal Physiology* 298: F24–F34.
3. Romero DG, Plonczynski MW, Welsh BL, Gomez-Sanchez CE, Zhou MY, et al. (2007) Gene expression profile in rat adrenal zona glomerulosa cells stimulated with aldosterone secretagogues. *Physiological Genomics* 32: 117–127.
4. Rojek A, Rojek A, Fuchtbauer E, Fuchtbauer E, Kwon T, et al. (2006) Severe urinary concentrating defect in renal collecting duct-selective AQP2 conditional-knockout mice.

- 276        Proceedings of The National Academy of Sciences of The United States of America 103:  
277        6037–6042.
- 278        5. Nielsen S, Chou C, Marples D, Christensen E, Kishore B, et al. (1995) Vasopressin  
279        increases water permeability of kidney collecting duct by inducing translocation of  
280        aquaporin-CD water channels to plasma-membrane. Proceedings of The National  
281        Academy of Sciences of The United States of America 92: 1013–1017.
- 282        6. Mobasheri A, Marples D, Young IS, Floyd RV, Moskaluk CA, et al. (2007) Distribution  
283        of the AQP4 Water Channel in Normal Human Tissues: Protein and Tissue Microarrays  
284        Reveal Expression in Several New Anatomical Locations, including the Prostate Gland  
285        Seminal Vesicles. Channels 1: 30–39.
- 286        7. Bedford JJ, Leader JP, Walker RJ (2003) Aquaporin expression in normal human kidney  
287        and in renal disease. Journal of the American Society of Nephrology 14: 2581–2587.
- 288        8. Nielsen S, Kwon TH, Christensen BM, Promeneur D, Frøkiaer J, et al. (1999) Physiology  
289        and pathophysiology of renal aquaporins. Journal of the American Society of Nephrology  
290        10: 647–663.
- 291        9. Gallardo PA, Cortés A, Bozinovic F (2005) Phenotypic flexibility at the molecular and  
292        organismal level allows desert-dwelling rodents to cope with seasonal water availability.  
293        Physiological and Biochemical Zoology 78: 145–152.
- 294        10. Kaissling B, De Rouffignac C, Barrett JM, Kriz W (1975) The structural organization  
295        of the kidney of the desert rodent *Psammomys obesus*. Anatomy and Embryology 148:  
296        121–143.
- 297        11. Altschuler EM, Nagle RB, Braun EJ, Lindstedt SL, Krutzsch PH (1979) Morphological  
298        study of the desert heteromyid kidney with emphasis on the genus *Perognathus*. The  
299        Anatomical Record 194: 461–468.
- 300        12. Marra NJ, Romero a, DeWoody Ja (2014) Natural selection and the genetic basis of  
301        osmoregulation in heteromyid rodents as revealed by RNA-seq. Molecular Ecology 23:  
302        2699–2711.
- 303        13. Giorello FM, Feijoo M, D'Elía G, Valdez L, Opazo JC, et al. (2014) Characterization of  
304        the kidney transcriptome of the South American olive mouse *Abrothrix olivacea*. BMC  
305        Genomics 15: 446.
- 306        14. Veal R, Caire W (2001) *Peromyscus eremicus*. Mammalian Species 118: 1–6.

- 307 15. Feng BJ, Sun LD, Soltani-Arabshahi R, Bowcock AM, Nair RP, et al. (2007) Toward  
308 a Molecular Phylogeny for *Peromyscus*: Evidence from Mitochondrial Cytochrome- b  
309 Sequences. *Journal of Mammalogy* 88: 1146–1159.
- 310 16. Shorter KR, Owen A, anderson V, Hall-South AC, Hayford S, et al. (2014) Natural genetic  
311 variation underlying differences in *Peromyscus* repetitive and social/aggressive behaviors.  
312 *Behavior genetics* 44: 126–135.
- 313 17. Panhuis TM, Broitman-Maduro G, Uhrig J, Maduro M, Reznick DN (2011) Analysis of  
314 Expressed Sequence Tags from the Placenta of the Live-Bearing Fish Poeciliopsis (Poe-  
315 ciliidae). *Journal of Heredity* 102: 352–361.
- 316 18. Shorter KR, Crossland JP, Webb D, Szalai G, Felder MR, et al. (2012) *Peromyscus* as a  
317 Mammalian Epigenetic Model. *Genetics Research International* 2012: 1–11.
- 318 19. Sikes RS, Gannon WL, Animal Care and Use Committee of the American Society of  
319 Mammalogists (2011) Guidelines of the American Society of Mammalogists for the use of  
320 wild mammals in research. *Journal of Mammalogy* 92: 235–253.
- 321 20. Heo Y, Wu XL, Chen D, Ma J, Hwu WM (2014) BLESS: Bloom filter-based error correc-  
322 tion solution for high-throughput sequencing reads. *Bioinformatics* 30: 1354–1362.
- 323 21. MacManes MD (2014) On the optimal trimming of high-throughput mRNA sequence  
324 data. *Frontiers in Genetics* 5.
- 325 22. Mbandi SK, Hesse U, Rees DJG, Christoffels A (2014) A glance at quality score: Impli-  
326 cation for *de novo* transcriptome reconstruction of Illumina reads. *Frontiers in Genetics*  
327 5: 17.
- 328 23. Lohse M, Bolger AM, Nagel A, Fernie AR, Lunn JE, et al. (2012) RobiNA: A user-friendly,  
329 integrated software solution for RNA-Seq-based transcriptomics. *Nucleic Acids Research*  
330 40: W622–7.
- 331 24. Haas BJ, Papanicolaou A, Yassour M, Grabherr M, Blood PD, et al. (2013) *De novo*  
332 transcript sequence reconstruction from RNA-seq using the Trinity platform for reference  
333 generation and analysis. *Nature Protocols* 8: 1494–1512.
- 334 25. **MacManes** MD, Lacey EA (2012) The Social Brain: Transcriptome Assembly and Char-  
335 acterization of the Hippocampus from a Social Subterranean Rodent, the Colonial Tuco-  
336 Tuco (*Ctenomys sociabilis*). *PLOS ONE* 7: e45524.

- 337 26. Li W, Godzik A (2006) Cd-hit: A fast program for clustering and comparing large sets of  
338 protein or nucleotide sequences. *Bioinformatics* 22: 1658–1659.
- 339 27. Camacho C, Coulouris G, Avagyan V, Ma N, Papadopoulos J, et al. (2009) BLAST+:  
340 architecture and applications. *BMC Bioinformatics* 10: 421.
- 341 28. Mi H (2004) The PANTHER database of protein families, subfamilies, functions and  
342 pathways. *Nucleic Acids Research* 33: D284–D288.
- 343 29. Wheeler TJ, Eddy SR (2013) nhmmer: DNA homology search with profile HMMs. *Bioin-*  
344 *formatics* 29: 2487–2489.
- 345 30. Punta M, Coghill PC, Eberhardt RY, Mistry J, Tate J, et al. (2012) The Pfam protein  
346 families database. *Nucleic Acids Research* 40: D290–301.
- 347 31. Li H (2013) Aligning sequence reads, clone sequences and assembly contigs with BWA-  
348 MEM .
- 349 32. Roberts A, Pachter L (2013) Streaming fragment assignment for real-time analysis of  
350 sequencing experiments. *Nature Methods* 10: 71–73.
- 351 33. Korneliussen I Thorfinn Sand Moltke, Albrechtsen a, Nielsen R (2013) Calculation of  
352 Tajima’s D and other neutrality test statistics from low depth next-generation sequencing  
353 data. *BMC Bioinformatics* 14: 289.
- 354 34. Ranwez V, Harispe S, Delsuc F, Douzery EJP (2011) MACSE: Multiple Alignment of  
355 Coding SEquences Accounting for Frameshifts and Stop Codons. *PLOS ONE* 6: e22594.
- 356 35. Aubry S, Kelly S, Kumpers BMC, Smith-Unna RD, Hibberd JM (2014) Deep Evolutionary  
357 Comparison of Gene Expression Identifies Parallel Recruitment of Trans-Factors in Two  
358 Independent Origins of C4 Photosynthesis. *PLOS Genetics* 10: e1004365.
- 359 36. Yang Z, dos Reis M (2011) Statistical Properties of the Branch-Site Test of Positive  
360 Selection. *Molecular Biology and Evolution* 28: 1217–1228.
- 361 37. Yang Z (2007) PAML 4: Phylogenetic Analysis by Maximum Likelihood. *Molecular*  
362 *Biology and Evolution* 24: 1586–1591.
- 363 38. Chamary JV, Parmley JL, Hurst LD (2006) Hearing silence: non-neutral evolution at  
364 synonymous sites in mammals. *Nature Reviews Genetics* 7: 98–108.
